# Supplementary material for: Integrated Classification of Prostate Cancer Reveals a Novel Luminal Subtype with Poor Outcome
Source: Oxford University Press journal article supplement (doi:10.1158/0008-5472.can-16-0902), 2016-06-15
Supplement: 00085472can160902-sup-164316_1_supp_3486154_v6xg3v.docx [file 00085472can160902-sup-164316_1_supp_3486154_v6xg3v.docx]

Supplementary Table S3. The genes in the collection of pathway signatures used in this study.

| Pathway | Reference | Genes (Entrez Gene ID) |
| --- | --- | --- |
| AR | Sharma et al., Cancer Cell (2013) | 152940, 151258, 399948, 126432, 153129, 442117, 57600, 80820, 79143, 126075, 130355, 152485, 162073, 253012, 285636, 389072, 400451, 401152, 402117, 493869, 646603, 162333, 10162, 2122, 389336, 169166, 4803, 78815, 57185, 9182, 5122, 5128, 5218, 55331, 5339, 54704, 5828, 9743, 51246, 6434, 84900, 121601, 100124539, 780776, 728416, 677841, 677823, 677802, 654463, 646962, 643836, 619279, 613212, 504189, 494551, 445815, 445347, 404220, 404093, 403274, 403273, 401546, 401138, 390437, 390174, 389941, 389337, 388697, 387104, 376940, 375449, 375056, 374882, 373156, 344901, 344838, 344758, 343035, 341032, 340359, 340252, 339512, 339403, 337974, 337968, 286676, 286183, 286151, 286122, 286053, 285704, 285590, 285527, 285386, 284756, 284618, 284613, 284612, 284266, 284186, 284185, 284083, 284076, 284001, 283991, 283554, 283450, 283349, 280636, 261729, 259286, 257313, 257068, 257019, 256987, 256435, 256364, 256281, 255631, 254827, 254158, 254048, 252969, 245972, 222962, 222389, 222255, 222194, 222183, 222166, 221981, 221937, 221935, 221895, 221527, 221481, 221294, 221178, 221143, 221037, 221035, 220965, 219988, 219902, 219899, 219621, 206358, 203286, 203260, 203228, 203197, 203068, 202915, 202151, 201625, 201266, 200162, 200150, 199920, 197370, 197358, 192134, 191585, 170850, 170690, 170506, 168667, 166979, 164045, 163882, 163702, 163486, 162282, 159195, 157680, 155435, 155368, 154810, 154091, 153443, 153241, 153201, 152330, 152006, 150864, 150684, 148641, 147912, 147798, 147463, 146862, 146691, 145482, 145376, 145282, 145226, 143458, 143162, 140460, 138046, 137682, 136227, 135932, 134957, 133686, 132660, 131616, 131566, 131405, 130733, 130617, 130162, 129642, 129531, 129285, 128178, 127670, 127018, 127002, 126868, 126364, 124817, 124540, 124152, 123041, 121504, 120534, 119504, 118426, 117531, 116512, 116285, 116225, 116154, 116113, 115825, 114907, 114899, 114884, 114876, 114825, 114804, 114784, 113829, 113174, 112936, 112858, 112616, 96459, 94241, 94240, 94234, 93129, 92714, 92565, 92400, 92399, 92105, 91869, 91748, 91584, 91526, 91120, 90993, 90576, 90529, 90268, 90102, 89796, 89778, 87178, 85865, 85479, 85476, 85462, 85457, 85444, 85439, 85415, 85377, 85026, 84976, 84955, 84952, 84923, 84919, 84918, 84904, 84902, 84869, 84830, 84679, 84668, 84645, 84623, 84614, 84569, 84532, 84524, 84293, 84263, 84262, 84191, 84135, 84074, 84072, 84068, 84002, 83998, 83988, 83940, 83939, 83938, 83930, 83786, 83648, 83641, 83593, 83544, 83538, 83451, 83449, 81839, 81796, 81789, 81788, 81693, 81671, 81627, 81617, 81606, 81567, 81563, 81553, 81545, 81537, 81037, 81031, 80829, 80824, 80745, 80736, 80727, 80723, 80279, 80176, 80153, 80149, 80036, 80017, 79977, 79974, 79949, 79944, 79915, 79906, 79905, 79875, 79867, 79846, 79840, 79838, 79831, 79813, 79809, 79794, 79789, 79783, 79772, 79740, 79736, 79712, 79705, 79698, 79695, 79689, 79674, 79668, 79658, 79642, 79582, 79411, 79363, 79170, 79165, 79158, 79135, 79098, 79065, 79038, 79031, 65979, 65266, 65083, 65008, 64921, 64919, 64852, 64849, 64816, 64778, 64769, 64756, 64754, 64748, 64743, 64710, 64420, 64374, 64328, 64207, 64167, 64087, 64084, 64083, 64072, 64067, 64061, 63892, 60678, 60676, 60468, 59352, 59351, 59084, 58517, 58511, 58490, 58480, 57862, 57822, 57763, 57713, 57709, 57706, 57704, 57685, 57664, 57657, 57630, 57623, 57597, 57580, 57560, 57552, 57544, 57533, 57528, 57509, 57507, 57496, 57463, 57458, 57452, 57415, 57337, 57223, 57221, 57188, 57181, 57122, 57118, 57117, 57107, 57097, 57018, 56992, 56980, 56975, 56950, 56943, 56934, 56925, 56922, 56914, 56892, 56302, 56288, 56262, 56243, 56204, 56172, 56164, 55970, 55966, 55917, 55869, 55824, 55812, 55803, 55799, 55785, 55766, 55760, 55700, 55698, 55691, 55689, 55672, 55667, 55650, 55638, 55610, 55554, 55553, 55512, 55503, 55502, 55432, 55422, 55366, 55297, 55291, 55226, 55223, 55220, 55214, 55209, 55204, 55198, 55190, 55187, 55186, 55180, 55164, 55163, 55157, 55156, 55139, 55093, 55062, 55061, 55041, 55039, 55017, 54954, 54948, 54897, 54892, 54882, 54879, 54858, 54848, 54828, 54823, 54820, 54815, 54806, 54805, 54788, 54752, 54742, 54677, 54663, 54622, 54620, 54566, 54545, 54541, 54539, 54532, 54514, 54499, 54491, 54475, 54464, 54463, 54455, 54437, 54328, 54187, 53371, 53343, 51752, 51741, 51735, 51729, 51727, 51704, 51703, 51666, 51633, 51631, 51608, 51601, 51585, 51559, 51555, 51454, 51441, 51426, 51385, 51366, 51350, 51263, 51204, 51199, 51196, 51187, 51174, 51171, 51138, 51130, 51112, 51109, 51092, 51075, 51029, 51019, 50939, 50807, 50640, 50512, 50484, 43847, 29998, 29995, 29927, 29843, 29842, 29087, 29028, 28999, 28998, 28958, 28957, 28951, 27347, 27339, 27314, 27303, 27293, 27250, 27241, 27240, 27230, 27185, 27156, 27151, 27132, 27109, 27086, 27085, 27075, 27074, 27042, 26959, 26747, 26526, 26524, 26468, 26298, 26272, 26240, 26235, 26229, 26227, 26166, 26137, 26130, 26098, 26090, 26085, 26084, 26074, 26053, 26047, 26038, 26018, 26011, 26005, 25996, 25962, 25937, 25932, 25917, 25902, 25885, 25841, 25833, 25831, 25825, 25816, 23760, 23732, 23731, 23705, 23642, 23623, 23576, 23566, 23549, 23545, 23531, 23522, 23514, 23499, 23463, 23403, 23384, 23383, 23368, 23365, 23353, 23350, 23327, 23321, 23316, 23310, 23287, 23286, 23270, 23250, 23247, 23230, 23200, 23189, 23171, 23150, 23143, 23133, 23120, 23107, 23105, 23101, 23097, 23094, 23092, 23085, 23059, 23043, 23029, 23026, 23024, 23012, 23007, 23002, 22989, 22985, 22947, 22941, 22933, 22920, 22917, 22901, 22890, 22889, 22887, 22882, 22877, 22875, 22874, 22873, 22871, 22843, 22820, 15116, 11335, 11331, 11277, 11270, 11243, 11238, 11236, 11167, 11148, 11144, 11141, 11138, 11107, 11103, 11079, 11077, 11057, 11016, 11010, 11005, 10954, 10947, 10919, 10910, 10752, 10742, 10735, 10718, 10712, 10667, 10656, 10648, 10647, 10643, 10637, 10611, 10579, 10578, 10563, 10560, 10551, 10538, 10529, 10521, 10512, 10497, 10490, 10488, 10458, 10455, 10451, 10436, 10418, 10417, 10404, 10402, 10397, 10370, 10329, 10307, 10298, 10276, 10257, 10250, 10242, 10229, 10221, 10217, 10211, 10208, 10207, 10200, 10179, 10160, 10142, 10129, 10124, 10087, 10082, 10067, 10058, 10057, 10036, 10026, 10011, 10008, 9967, 9901, 9886, 9863, 9830, 9827, 9804, 9788, 9781, 9766, 9739, 9734, 9732, 9725, 9723, 9722, 9699, 9698, 9687, 9686, 9679, 9678, 9673, 9657, 9650, 9649, 9645, 9622, 9612, 9609, 9607, 9603, 9586, 9580, 9578, 9577, 9550, 9545, 9518, 9516, 9515, 9501, 9493, 9472, 9455, 9439, 9404, 9382, 9378, 9369, 9318, 9223, 9219, 9209, 9202, 9197, 9181, 9169, 9166, 9146, 9120, 9117, 9110, 9071, 9066, 8994, 8992, 8915, 8893, 8874, 8864, 8840, 8833, 8814, 8749, 8743, 8738, 8678, 8671, 8667, 8629, 8622, 8621, 8620, 8607, 8600, 8563, 8556, 8555, 8553, 8538, 8496, 8495, 8439, 8434, 8419, 8412, 8379, 8289, 8241, 8226, 8091, 8036, 8000, 7994, 7993, 7982, 7978, 7975, 7881, 7879, 7850, 7837, 7832, 7786, 7704, 7681, 7597, 7534, 7517, 7498, 7494, 7482, 7474, 7464, 7462, 7458, 7433, 7419, 7373, 7369, 7357, 7323, 7294, 7216, 7204, 7169, 7163, 7113, 7104, 7094, 7090, 7088, 7084, 7068, 7052, 7050, 7047, 7038, 7029, 7015, 7014, 7007, 7006, 6938, 6926, 6907, 6897, 6895, 6876, 6873, 6811, 6809, 6788, 6742, 6733, 6726, 6711, 6695, 6687, 6668, 6655, 6642, 6641, 6629, 6622, 6586, 6575, 6533, 6520, 6506, 6491, 6482, 6480, 6455, 6453, 6403, 6400, 6338, 6317, 6303, 6282, 6207, 6198, 6194, 6182, 6176, 6146, 6137, 6119, 6118, 6094, 6093, 6091, 6046, 6016, 6001, 5982, 5935, 5918, 5890, 5873, 5867, 5865, 5834, 5799, 5797, 5795, 5788, 5787, 5784, 5747, 5740, 5641, 5602, 5597, 5596, 5587, 5581, 5580, 5578, 5577, 5550, 5540, 5530, 5500, 5495, 5468, 5435, 5414, 5337, 5327, 5317, 5314, 5313, 5311, 5286, 5244, 5208, 5207, 5201, 5195, 5192, 5169, 5156, 5152, 5149, 5144, 5142, 5139, 5101, 5098, 5090, 5087, 5073, 5049, 5045, 5028, 5019, 5007, 5001, 4953, 4931, 4926, 4925, 4921, 4919, 4915, 4869, 4856, 4849, 4824, 4799, 4783, 4782, 4781, 4774, 4773, 4758, 4718, 4715, 4690, 4681, 4660, 4653, 4651, 4638, 4604, 4430, 4292, 4286, 4254, 4246, 4245, 4224, 4215, 4171, 4154, 4149, 4128, 4121, 4088, 4071, 4026, 4012, 3987, 3977, 3964, 3960, 3930, 3909, 3899, 3851, 3850, 3849, 3848, 3817, 3816, 3782, 3781, 3778, 3768, 3751, 3747, 3732, 3725, 3714, 3709, 3708, 3680, 3664, 3642, 3638, 3632, 3613, 3612, 3592, 3570, 3480, 3475, 3295, 3290, 3191, 3181, 3169, 3158, 3156, 3109, 3108, 3098, 2982, 2975, 2969, 2936, 2932, 2919, 2917, 2909, 2878, 2824, 2823, 2813, 2804, 2781, 2768, 2752, 2737, 2692, 2651, 2632, 2629, 2587, 2585, 2568, 2549, 2515, 2494, 2331, 2329, 2317, 2309, 2242, 2224, 2222, 2201, 2200, 2194, 2169, 2158, 2153, 2138, 2132, 2131, 2120, 2118, 2115, 2104, 2052, 2051, 2029, 2009, 1998, 1982, 1956, 1937, 1896, 1891, 1879, 1857, 1839, 1836, 1805, 1803, 1769, 1767, 1756, 1740, 1719, 1718, 1716, 1674, 1659, 1657, 1630, 1622, 1612, 1611, 1607, 1600, 1591, 1523, 1512, 1501, 1500, 1496, 1489, 1488, 1468, 1452, 1408, 1389, 1365, 1364, 1356, 1345, 1305, 1280, 1198, 1196, 1180, 1131, 1124, 1119, 1112, 1053, 1052, 1050, 1047, 999, 987, 983, 950, 944, 928, 904, 883, 859, 845, 835, 832, 831, 820, 776, 768, 759, 753, 747, 687, 678, 654, 640, 636, 605, 604, 587, 574, 549, 545, 517, 495, 463, 419, 395, 364, 360, 354, 330, 311, 288, 284, 247, 242, 220, 216, 182, 164, 157, 154, 132, 120, 107, 55, 47, 40 |
| AR | Mendiratta et al., JCO (2009) | 3817, 3817, 7113, 65986, 27347, 4824, 10257, 55839, 8611, 1047, 56937, 57556, 9687, 2289, 7704, 2181, 7855, 10198, 3781, 10892, 79098, 354, 55839, 133, 10198, 29028, 10512, 5001, 9240, 51347, 354, 5192, 2181, 990, 6675, 22936, 7366, 10788, 8867, 5004, 3156, 445347, 11057, 55892, 220, 8495, 55081, 25816, 5865, 7057, 11057, 10892, 5001, 51514, 114882, 25816, 10638, 7113, 10892, 9935, 27232, 60481, 23052, 2181, 9455, 8611, 51465, 445347, 26046, 10198, 3156, 10645, 400451, 64780, 23099, 990, 56995, 23099, 8560, 5983, 3557, 5583, 79098, 51312, 10560, 2235, 23099, 5395, 22837, 2887, 55840, 1718, 1052, 10725, 5152, 9044, 57178, 5867, 3949, 54491, 55627, 4174, 114882, 7163, 6385, 54861, 10628, 23299, 25803, 481, 3177, 3613, 8756, 27244, 400451, 654342, 10954, 2237, 10059, 5366, 11167, 6936, 25840, 6659, 5062, 100506658, 6303, 1487, 9, 3638, 7088, 3915, 6482, 694, 54733, 90355, 10725, 6659, 4086, 8660, 5558, 55852, 55656, 23310, 993, 6652, 56829, 7976, 694, 2222, 8165, 6303, 3422, 100132565, 8165, 23327, 11057, 3108, 23086, 9686, 2235, 51002, 23001, 3422, 80232, 5867, 55623, 4173, 10096, 9619, 4172, 23216, 1487, 6652, 9518, 4792, 1487, 10397, 2542, 3817, 384, 79073, 23077, 23598, 50628, 10645, 4790, 55168, 5500, 6239, 10765, 23047, 6764, 5520, 8353, 8555, 4363, 4678, 8507, 10765, 23286, 31, 1119, 3417, 55718, 23112, 6309, 9686, 79170, 8349, 80003, 56985, 7795, 55604, 1831, 3915, 64087, 2800, 3229, 5797, 5293, 23327, 3983, 50814, 8473, 9261, 6867, 51317, 60481, 6774, 4047, 5373, 2222, 5813, 55041, 8050, 22998, 5962, 7703, 10903, 10096, 84187, 4121, 55144, 5074, 8879, 5813, 10276, 2734, 64710, 9894, 643854, 5927, 10715, 4077, 9019, 81671, 9813, 8237, 2063, 2582, 30850, 55252, 5687, 54676, 4953, 7763, 9750, 5908, 23355, 10475, 83440, 6310, 79726, 6809, 25800, 6655, 22845, 22905, 55347, 93487, 357, 3720, 8795, 9175, 26152, 23598, 1534, 3183, 11171, 9775, 8648, 3654, 7150, 10521, 2805, 80111, 8289 |
| AR | Nelson et al., PNAS (2002) | 3248, 8611, 6319, 6652, 1718, 6611, 51171, 220, 6303, 3157, 1622, 2683, 5264, 3422, 60481, 7358, 2181, 1644, 10788, 5238, 9455, 9590, 7163, 10611, 10645, 11099, 2982, 8821, 10461, 11217, 590, 5587, 6385, 5178, 56995, 8503, 57007, 6414, 2936, 6446, 27347, 4189, 3817, 354, 9622, 1362, 5274, 11047, 87, 3685, 3880, 3005, 11258, 10627, 4325, 2335, 56937, 567, 81563, 8916, 79689, 9510, 11057, 8241, 6675, 7982, 1801, 4094, 10397, 22936, 25816, 8555, 3398, 3398, 55502, 1487, 1024, 2289, 10497, 10257, 56172, 54407, 6616, 10513, 563, 3998, 5867, 6728, 1836, 9871, 9218, 6337, 2030, 4824, 25803, 65986, 8554, 8848, 84159, 9314, 4609 |
| AR-V | Hornberg et al., PLoS One (2011) | 72, 120, 140, 213, 216, 367, 699, 890, 983, 991, 1058, 1063, 1123, 1164, 1525, 1870, 1875, 1917, 2150, 2171, 2261, 2935, 2938, 3123, 3127, 3181, 3248, 3308, 3315, 3485, 3775, 3895, 4126, 4172, 4176, 4192, 4824, 5111, 5166, 5264, 5307, 5360, 5597, 5603, 5792, 5985, 6234, 6281, 6337, 6950, 7020, 7272, 7280, 7298, 7364, 7366, 7367, 7525, 7913, 8140, 8318, 8407, 8644, 8801, 8836, 9055, 9061, 9133, 9168, 9212, 9401, 10024, 10112, 10370, 10457, 10551, 10635, 11004, 11065, 11339, 22974, 23671, 25827, 25923, 25932, 26063, 26271, 29128, 51050, 51203, 51337, 51703, 55502, 55872, 57415, 57556, 57819, 64151, 79019, 81539, 81610, 81620, 81831, 83461, 83596, 83690, 83879, 84034, 84678, 84706, 93100, 116844, 127845, 139886, 140462, 140710, 145837, 146456, 151126, 154043, 201562, 203068, 221935, 253558, 259266, 388468, 388621, 391267, 399942, 400710, 401466, 402644, 440482, 440915, 642460, 645138, 645656, 646163, 647000, 647169, 653377, 653658, 100129028, 100131161 |
| AR-V | Hu et al., Cancer Res (2012) | 113130, 332, 699, 3838, 9735, 701, 994, 10459, 1062, 9700, 11004, 4751, 11113, 3835, 890, 11130, 22974, 995, 56992, 4085, 9088, 11065, 5347, 51203 |
| PTEN | Saal et al., PNAS (2007) | 330, 699, 891, 1010, 1062, 1164, 1207, 2618, 2999, 3066, 3608, 3833, 3838, 3925, 4172, 4175, 4259, 4291, 4751, 5052, 5290, 5359, 5612, 5718, 5870, 5873, 5889, 5984, 6612, 6619, 6632, 6732, 6772, 6941, 7159, 7307, 7372, 7444, 8208, 8317, 8532, 8833, 9133, 9232, 9392, 9493, 9711, 9833, 9928, 10440, 10541, 10589, 10606, 10951, 10963, 11004, 11073, 11169, 11222, 23279, 24137, 25852, 26973, 27238, 27316, 29028, 29127, 29979, 51642, 54503, 54534, 54625, 54845, 55248, 79694, 79894, 84056, 87178, 151188, 151246, 151636, 157313, 205564, 219988, 64844, 54906, 92342, 126731, 81610, 387103, 219285, 84955, 1503, 64789, 9787, 29105, 51773, 3192, 55827, 3796, 79132, 57380, 7936, 6426, 6434, 6596, 60313, 6790, 7280, 54014 |
| ERG | Tomlins et al., Neoplasia (2008); Setlur et al., JNCI (2008); Iljin et al., Cancer Res (2006) | 183, 272, 347, 397, 658, 776, 950, 999, 1280, 1298, 1485, 1627, 1644, 1824, 1889, 1983, 2078, 2152, 2153, 2528, 2690, 2705, 2812, 2867, 2982, 3065, 3109, 3249, 3549, 3710, 3781, 3783, 3790, 3800, 3918, 4035, 4217, 4646, 4725, 4883, 4905, 5074, 5140, 5152, 5192, 5226, 5575, 5585, 5597, 5607, 5719, 5754, 5796, 5832, 5989, 6001, 6294, 6602, 6629, 6675, 6833, 6899, 6908, 7027, 7088, 7174, 7291, 7326, 7358, 7520, 7551, 7941, 8030, 8505, 8507, 8618, 8648, 8672, 8766, 9053, 9073, 9112, 9411, 9529, 9766, 9892, 10202, 10269, 10321, 10477, 10551, 10557, 10656, 10801, 11052, 11079, 22877, 22881, 23250, 26037, 26751, 27199, 27314, 27347, 30848, 51365, 54880, 54997, 55384, 55623, 55753, 55884, 56099, 57630, 65108, 79570, 81557, 83988, 147741, 221395, 246100, 266977, 339260, 349160, 389432, 400710, 728239, 100133941, 100506658, 221061, 55614, 90625, 948, 8853, 3831, 5218, 23613, 5891, 4072, 23598 |
| FOXA1 | Jin et al., Cancer Res (2013) | 1644, 384, 6013, 2353, 3248, 7365, 6820, 150519, 1058, 8501, 84722, 2354, 222, 283651, 24137, 55771, 55388, 8034, 2030, 9609, 6038, 283651, 677765, 26793, 81035, 2731, 374393, 162681, 645121, 283349, 5406, 81624, 8825, 18, 1031, 642569, 100132920, 283130, 643904, 5167, 2187, 388161, 2005, 2521, 1763, 100132106, 57198, 83463, 606551, 23252, 83849, 403, 10384, 730268, 83903, 647718, 653387, 2870, 647250, 441957, 2177, 5558, 648200, 132864, 1846, 282969, 149830, 6019, 643265, 127700, 84904, 729003, 83540, 157313, 57124, 650061, 84750, 387921, 729667, 2981, 7439, 59341, 7035, 11052, 100134006, 387761, 729384, 5651, 11086, 100131871, 653665, 4594, 5783, 4603, 100128295, 55425, 26747, 9687, 641, 409, 124976, 50614, 30820, 5228, 51435, 4135, 730809, 642153, 148103, 100134550, 4477, 653111, 84296, 649984, 646236, 503542, 91431, 654222, 7940, 647748, 729383, 145837, 25, 649067, 100302254, 54784, 590, 29893, 83992, 286207, 4595, 728340, 390507, 729012, 57245, 79187, 10160, 1734, 387775, 653468, 650995, 642130, 27077, 728217, 2030, 143503, 8350, 51102, 652102, 391427, 100134248, 574508, 100131392, 643035, 90381, 650003, 55711, 100128781, 85414, 51313, 388946, 388242, 338692, 23074, 51776, 407046, 649676, 440311, 26809, 84224, 79643, 375449, 645164, 27324, 80742, 8796, 643233, 118738, 100132029, 100131768, 84532, 22836, 389690, 51430, 647336, 6038, 729392, 3158, 440072, 651952, 727722, 388394, 641958, 10868, 135114, 650852, 84140, 386724, 399939, 2587, 65061, 728114, 1553, 3955, 652185, 100128862, 375347, 643326, 100128374, 158326, 643150, 728352, 57144, 5950, 100128653, 340990, 339476, 100132317, 63976, 100128191, 144678, 647534, 11221, 727833, 221150, 440040, 7170, 653620, 51340, 54143, 1587, 100129986, 652610, 284083, 100128765, 572, 483, 255812, 650036, 84767, 100131243, 1804, 642167, 84068, 643085, 728531, 100134365, 728686, 724027, 622, 127002, 4543, 130540, 348021, 10814, 730394, 5178, 644305, 445347, 2267, 55867, 9768, 340970, 339977, 392232, 728780, 168455, 84553, 404785, 100302116, 5239, 652251, 203430, 100133213, 652490, 652046, 642411, 644041, 10659, 646791, 100131454, 56953, 643943, 55120, 57402, 5947, 5741, 641714, 729198, 161635, 645113, 2260, 100126693, 100132649, 2155, 644990, 390705, 22999, 79370, 653527, 388507, 124, 341230, 128506, 92106, 50515, 651381, 644943, 645485, 55329, 201299, 100133599, 54490, 54821, 79097, 23510, 100134651, 643623, 643246, 91614, 645425, 729240, 285755, 10168, 340024, 158471, 64087, 100129200, 140432, 100134539, 643722, 649184, 406911, 55166, 9700, 643906, 256309, 100127952, 645726, 590, 646976, 650749, 650274, 80312, 995, 222, 3164, 388666, 80741, 146481, 100134050, 653333, 23273, 80204, 133609, 85462, 9793, 284260, 26018, 23178, 7480, 158471, 10720, 126, 648979, 653689, 142827, 121214, 730024, 217, 55199, 644785, 639, 100302203, 254428, 5004, 100128908, 100133311, 645875, 4951, 100129463, 41, 57464, 649214, 7035, 57824, 729051, 219, 730861, 56959, 89944, 57222, 440153, 100073347, 2650, 7033, 8821, 286527, 5831, 55504, 642362, 1404, 9882, 4751, 154091, 11200, 94104, 55247, 6080, 1010, 389206, 5557, 100133898, 5557, 26018, 84058, 57221, 112611, 51073, 4173, 100132464, 64946, 23306, 55504, 594837, 25953, 645691, 89876, 100132964, 259217, 53834, 441484, 2146, 594838, 91057, 53834, 5427, 65062, 55038, 55658, 23286, 151246, 3169, 5631, 4494, 10714, 26272 |
| FOXA1 | Robinson et al., Oncogene (2013) | 3336, 1981, 644634, 140901, 9415, 115948, 64061, 728643, 4627, 85456, 57805, 2975, 79977, 23420, 103, 220686, 10523, 3609, 388692, 29128, 445347, 9020, 5934, 9993, 25832, 338707, 22974, 221035, 23318, 11051, 11198, 5585, 124565, 8301, 63901, 8916, 10298, 949, 1399, 440270, 390916, 701, 56882, 55683, 116064, 55502, 26039, 644745, 2064, 3714, 10648, 6720, 22998, 10628, 3187, 10193, 728857, 22911, 286075, 7259, 7155, 7913, 10963, 84895, 23310, 2624, 9589, 9191, 3304, 65123, 7317, 6837, 7536, 353131, 6744, 652713, 23244, 56882, 54443, 132671, 3609, 399664, 2870, 4172, 441205, 7475, 653199, 126133, 6522, 9267, 4128, 339287, 1981, 440915, 11167, 4820, 1717, 3091, 392288, 9918, 3158, 27328, 25929, 25957, 326, 1982, 1108, 1949, 50628, 23052, 2289, 329, 7082, 3232, 1639, 652160, 221981, 389322, 729154, 83606, 2101, 5422, 200030, 51701, 55706, 9922, 51402, 26054, 11338, 5213, 9688, 23517, 645879, 8473, 23270, 64207, 647500, 3985, 56829, 56853, 653321, 4302, 649702, 64061, 647983, 54545, 201255, 4605, 55905, 729234, 8539, 23451, 6574, 6238, 100129543, 9013, 7544, 22985, 653419, 23306, 54093, 644322, 647000, 8897, 27333, 5192, 649908, 10985, 4627, 5925, 646665, 5584, 9854, 64848, 10594 |
| SPOP | Geng et al., Cancer Res (2014) | 730996, 6446, 3936, 58480, 354, 79054, 6446, 10397, 6446, 646723, 25803, 57801, 54490, 6590, 4070, 5225, 1811, 79054, 54206, 2235, 4316, 585, 55897, 148327, 649970, 4316, 4285, 85012, 8611, 10257, 246, 8611, 23623, 390557, 3710 |
| EZH2 | Xu et al., Science (2013) | 5036, 9401, 5315, 51069, 55052, 5886, 29082, 91057, 5707, 199699, 64426, 2289, 7398, 5810, 7417, 10155, 8550, 29028, 9768, 11004, 790, 4801, 55299, 122769, 6426, 132, 3029, 10592, 81620, 56834, 57696, 64222, 256126, 26517, 90480, 84262, 128239, 1111, 65003, 64105, 10921, 26528, 51081, 1164, 4796, 6883, 6883, 57819, 79902, 4176, 5514, 4173, 55631, 23204, 5889, 56683, 790955, 7329, 5434, 79171, 51154, 10535, 55146, 1869, 10640, 6520, 4860, 1981, 2091, 1537, 5757, 5718, 23548, 5216, 79959, 1841, 55706, 80179, 4893, 79447, 10426, 1810, 54069, 10614 |
| PRC | Lee et al., Cell (2006) | 6833, 25841, 170689, 170692, 105, 196883, 114, 116, 148, 150, 153, 155, 246, 257, 60529, 138649, 84210, 389002, 84079, 362, 57569, 132946, 429, 430, 460, 23245, 463, 467, 474, 84913, 579, 56751, 343472, 56033, 8538, 596, 79365, 128408, 27319, 353500, 646, 7832, 283078, 25789, 375061, 387597, 148753, 149499, 24141, 59271, 25927, 89876, 56934, 774, 776, 777, 8913, 796, 55450, 54897, 869, 140689, 874, 57332, 947, 925, 64072, 1005, 8941, 1031, 1045, 55803, 94027, 94115, 51673, 9023, 140578, 8646, 25884, 64377, 338917, 1149, 4435, 146225, 1184, 161198, 64084, 26507, 1271, 255631, 84570, 85301, 1280, 1287, 1288, 1298, 81035, 1311, 84940, 1394, 9244, 55118, 1412, 64478, 114788, 1501, 57369, 9547, 58191, 1591, 1592, 56603, 340665, 1594, 1602, 117154, 166614, 1630, 54798, 23576, 1608, 9162, 50846, 1735, 25849, 22943, 27123, 54567, 1745, 1746, 1747, 1748, 1761, 10655, 58524, 220164, 8110, 283417, 1816, 1825, 57453, 53905, 50506, 1846, 9427, 1942, 1944, 25975, 1960, 1961, 55531, 2019, 2020, 8320, 2034, 64097, 2044, 2047, 2049, 2066, 90952, 83715, 80712, 2149, 151647, 163933, 57795, 339479, 284716, 151354, 2201, 2203, 55336, 26273, 54738, 9638, 26281, 2248, 2250, 2254, 344018, 2313, 54508, 79962, 54790, 150538, 151278, 283212, 91607, 400765, 253650, 349152, 129804, 203111, 400591, 388336, 399717, 389064, 23768, 3170, 27023, 2306, 27022, 349334, 200350, 286380, 387054, 2304, 2294, 2290, 2302, 2300, 668, 257019, 2526, 11211, 2535, 2555, 2557, 2572, 2583, 124872, 374378, 8811, 2624, 2625, 2626, 2627, 2637, 392255, 151449, 2668, 2690, 2693, 55340, 2706, 23127, 9630, 2262, 2824, 2834, 83550, 2835, 338557, 54112, 2891, 2894, 2897, 2899, 116443, 2917, 145258, 2928, 219409, 170825, 2982, 3000, 9464, 3039, 3040, 54626, 84667, 23462, 55733, 3087, 64399, 3142, 3110, 3167, 340784, 3211, 10481, 3212, 3213, 3216, 3217, 3218, 3227, 3228, 3221, 3222, 3223, 3224, 3231, 3238, 3239, 3232, 3233, 3234, 3235, 51440, 60495, 8739, 9953, 388605, 266722, 3299, 3310, 3350, 3358, 3363, 7087, 51214, 84966, 26280, 3574, 9118, 84684, 3645, 3651, 79191, 50805, 10265, 3670, 64843, 3676, 3706, 3725, 81621, 3736, 3738, 7881, 3747, 3749, 3752, 3756, 23416, 56660, 56659, 3776, 50801, 3778, 3786, 27012, 22846, 57214, 57535, 85376, 84623, 9365, 9314, 339855, 10660, 3958, 8549, 9355, 89884, 64211, 26468, 431707, 4010, 124842, 127003, 143903, 148898, 150221, 153684, 200030, 340529, 388394, 388407, 389289, 400120, 405753, 440804, 441413, 441425, 441426, 441430, 441459, 56901, 92162, 23284, 4023, 57631, 145581, 4036, 347730, 4053, 4058, 256586, 4081, 10586, 9935, 4118, 5596, 4137, 55283, 55897, 284207, 84803, 145773, 440482, 340419, 403312, 4300, 9242, 4487, 4489, 4490, 4496, 4499, 326343, 4618, 4645, 4654, 162417, 89797, 4684, 4741, 4747, 4745, 4760, 4761, 4762, 63973, 50674, 4784, 90527, 4821, 159296, 26257, 4824, 4825, 84504, 145741, 8715, 4861, 255743, 4883, 4884, 4886, 7026, 8013, 3084, 9542, 220323, 84618, 9423, 84628, 4914, 4915, 266743, 4948, 25903, 10215, 3175, 9480, 4985, 84709, 130497, 133060, 92736, 347741, 23440, 5013, 5015, 64064, 5069, 5075, 5076, 5077, 5080, 5081, 7849, 5083, 27253, 5100, 9659, 5156, 9758, 23037, 5179, 5239, 5241, 401, 8929, 8395, 8544, 5307, 5308, 5309, 63876, 5317, 5339, 5362, 5376, 127435, 5426, 5453, 5456, 5457, 5458, 5459, 22843, 84366, 59335, 54886, 5581, 5592, 60675, 256297, 5729, 5732, 5733, 5734, 5737, 5744, 11122, 10076, 5827, 5697, 84084, 399694, 5923, 83593, 30062, 5950, 9185, 28984, 6001, 8601, 388531, 11035, 79836, 79589, 64221, 27330, 10633, 284654, 349667, 6263, 79966, 6330, 6340, 6344, 80031, 6422, 6425, 130367, 6469, 6473, 6474, 54847, 6493, 6495, 10736, 6496, 4990, 201780, 6506, 6509, 123041, 5172, 11001, 7780, 7781, 7782, 140679, 148641, 6529, 6531, 9152, 6549, 6550, 6578, 81796, 6585, 9353, 114798, 22865, 80235, 55509, 114815, 22986, 8403, 64321, 83595, 9576, 50859, 10418, 6716, 6751, 6752, 8128, 55351, 11075, 29091, 55061, 9899, 91683, 6886, 10716, 6899, 6909, 30009, 6926, 6910, 6920, 6928, 339488, 7056, 113091, 7080, 7092, 3195, 3196, 23671, 57393, 161291, 29767, 970, 7161, 8717, 7200, 55521, 440730, 114088, 7224, 85480, 57348, 7349, 7350, 8633, 389658, 124590, 11023, 25806, 7421, 30813, 49856, 51352, 7471, 80326, 7480, 7481, 51384, 7472, 89780, 7475, 7476, 7490, 284273, 7704, 340595, 9839, 57732, 7545, 84107, 84225, 55079, 80818, 84858, 22806 |
| PRC | Yu et al., Cancer Res (2007) | 26, 70, 627, 744, 783, 958, 1075, 1116, 1511, 1571, 1803, 1909, 2051, 2258, 2532, 2774, 3071, 3077, 3371, 3683, 3689, 3696, 3872, 4223, 4625, 4629, 4635, 4646, 5179, 5376, 5592, 5733, 6013, 6387, 6505, 6622, 6863, 6928, 7040, 7227, 7472, 8013, 8406, 8835, 8854, 9172, 9180, 9506, 9508, 10468, 11080, 11279, 23314, 24141, 25802, 25924, 25937, 26167, 27123, 27151, 28984, 30061, 51309, 51384, 51700, 53405, 54738, 55504, 55816, 57094, 57172, 57418, 57569, 57821, 60495, 64399, 66004, 79258, 79365, 81035, 81553, 91607, 114788, 133584, 168667, 221833, 283078 |
| RAS | Bild et al., Nature (2006) | 101, 154, 384, 490, 650, 688, 805, 813, 829, 1316, 1453, 1454, 1594, 1604, 1743, 1839, 1843, 1846, 1847, 1848, 1947, 1958, 1969, 1992, 2004, 2069, 2317, 2353, 2683, 2707, 2709, 2710, 2810, 2919, 2920, 2921, 3099, 3265, 3552, 3553, 3576, 3589, 3598, 3628, 3673, 3710, 3726, 3775, 3783, 3949, 3976, 4084, 4170, 4237, 4323, 4615, 4907, 4953, 5055, 5266, 5268, 5292, 5293, 5329, 5362, 5473, 5621, 5743, 5744, 5791, 5806, 5817, 6277, 6303, 6364, 6374, 6382, 6385, 6515, 6525, 6548, 6574, 6675, 6804, 6926, 7039, 7076, 7150, 7262, 7277, 7378, 7422, 7538, 7804, 7851, 7980, 8651, 8795, 8797, 8848, 8870, 8900, 9123, 9136, 9170, 9221, 9227, 9518, 9590, 9592, 9938, 9943, 9982, 10105, 10135, 10140, 10184, 10221, 10397, 10509, 10687, 10855, 10938, 11007, 11332, 22822, 23135, 23227, 23529, 23645, 23767, 26092, 29005, 29126, 50486, 50515, 50640, 51129, 51228, 51312, 51330, 54676, 54910, 55117, 55149, 55384, 55612, 55700, 56938, 64332, 64750, 64866, 65059, 79413, 79686, 79993, 80328, 80853, 81631, 81848, 83667, 84002, 84803, 84951, 84985, 85450, 89795, 94234, 117195, 119548, 120224, 129642, 135398, 144195, 152519, 163259, 201176, 201799, 285672 |
| ES | Assou et al., Stem Cells (2007) | 58, 70, 89, 119, 142, 249, 262, 332, 477, 657, 699, 701, 708, 836, 875, 890, 891, 934, 983, 990, 991, 993, 1075, 1111, 1381, 1382, 1400, 1434, 1525, 1592, 1690, 1719, 1730, 1741, 1763, 1788, 1789, 1829, 1894, 2030, 2041, 2058, 2064, 2115, 2118, 2171, 2237, 2239, 2247, 2258, 2260, 2289, 2308, 2558, 2562, 2571, 2618, 2697, 2731, 2824, 2842, 2956, 3038, 3070, 3149, 3159, 3161, 3182, 3308, 3312, 3329, 3609, 3620, 3710, 3720, 3730, 3790, 3800, 3818, 3838, 3856, 3932, 3964, 4072, 4074, 4124, 4141, 4144, 4171, 4172, 4173, 4174, 4175, 4176, 4240, 4257, 4277, 4361, 4436, 4521, 4522, 4678, 4801, 4838, 4869, 4913, 4922, 4947, 4998, 5058, 5097, 5134, 5163, 5198, 5291, 5331, 5366, 5393, 5411, 5420, 5427, 5460, 5495, 5519, 5521, 5557, 5558, 5613, 5631, 5771, 5803, 5865, 5919, 5932, 5983, 5984, 6059, 6091, 6229, 6241, 6297, 6299, 6337, 6422, 6423, 6426, 6432, 6480, 6535, 6566, 6611, 6626, 6638, 6653, 6657, 6741, 6997, 7004, 7013, 7019, 7072, 7112, 7138, 7360, 7374, 7447, 7546, 7547, 7748, 7804, 7855, 7913, 8087, 8239, 8324, 8433, 8519, 8577, 8607, 8611, 8615, 8745, 8805, 8820, 8842, 8880, 8886, 9053, 9074, 9143, 9184, 9188, 9201, 9212, 9221, 9232, 9282, 9350, 9456, 9473, 9573, 9603, 9787, 9908, 9910, 10011, 10036, 10049, 10053, 10146, 10149, 10153, 10157, 10196, 10308, 10346, 10360, 10383, 10434, 10439, 10459, 10528, 10606, 10606, 10622, 10635, 10637, 10643, 10644, 10797, 10874, 11004, 11040, 11051, 11061, 11083, 11143, 11145, 11168, 11169, 11200, 11245, 11339, 22800, 22823, 22929, 23108, 23170, 23178, 23195, 23242, 23246, 23397, 23401, 23411, 23468, 23534, 23683, 24137, 25788, 25926, 25957, 26018, 26047, 26053, 26135, 26207, 26354, 27022, 27231, 29078, 29785, 29920, 51018, 51053, 51083, 51104, 51268, 51385, 51444, 51491, 51574, 51575, 51582, 51599, 51659, 51704, 51816, 54014, 54069, 54478, 54517, 54566, 54596, 54821, 54845, 54892, 54989, 55003, 55010, 55120, 55211, 55237, 55270, 55299, 55320, 55366, 55388, 55660, 55706, 55726, 55749, 55759, 55920, 55975, 56548, 56915, 57122, 57167, 57181, 57380, 57405, 57486, 57502, 57504, 57541, 57556, 57633, 57685, 58516, 63978, 64318, 64782, 64849, 65981, 79007, 79012, 79023, 79071, 79075, 79158, 79647, 79664, 79727, 79923, 79960, 80155, 80179, 80324, 80775, 81539, 81542, 81554, 81620, 81848, 83439, 83596, 84101, 84296, 84343, 84549, 84889, 84891, 90806, 90990, 91431, 92667, 93099, 112399, 113130, 114569, 115572, 117156, 120071, 157627, 157695, 220042, 221079, 347733, 548596 |
| AV | Beltran et al., Cancer Discov (2011) | 268, 292, 317, 610, 613, 656, 699, 701, 745, 782, 835, 890, 899, 990, 991, 997, 1058, 1062, 1063, 1072, 1072, 1122, 1132, 1141, 1351, 1387, 1412, 1455, 1503, 1663, 1759, 1846, 1850, 1869, 1870, 1871, 1917, 1952, 1978, 2026, 2161, 2176, 2237, 2245, 2256, 2297, 2305, 2491, 2529, 2563, 2583, 2584, 2644, 2781, 2786, 2821, 2918, 3026, 3161, 3195, 3225, 3227, 3609, 3619, 3710, 3714, 3714, 3757, 3777, 3796, 3832, 3992, 4001, 4023, 4131, 4171, 4174, 4175, 4176, 4241, 4288, 4521, 4605, 4642, 4661, 4670, 4751, 4803, 4821, 4841, 4879, 4881, 4917, 4985, 4998, 5050, 5260, 5347, 5355, 5424, 5442, 5478, 5557, 5603, 5623, 5630, 5662, 5753, 5985, 6175, 6241, 6294, 6297, 6455, 6502, 6590, 6597, 6620, 6749, 6790, 6804, 6812, 6833, 6839, 6853, 6855, 6860, 6861, 7023, 7036, 7083, 7153, 7175, 7329, 7425, 7516, 7546, 7703, 8021, 8120, 8175, 8193, 8208, 8290, 8317, 8318, 8359, 8475, 8497, 8614, 8655, 8914, 8927, 8941, 9080, 9088, 9127, 9128, 9133, 9148, 9156, 9203, 9212, 9232, 9319, 9355, 9479, 9480, 9493, 9515, 9524, 9578, 9582, 9700, 9735, 9787, 9824, 9837, 9918, 9928, 10036, 10083, 10112, 10287, 10459, 10460, 10501, 10535, 10635, 10733, 10736, 10744, 10814, 10900, 10908, 10921, 10992, 10994, 11000, 11082, 11113, 11130, 11169, 11178, 11182, 11339, 22859, 22974, 22983, 22994, 23025, 23046, 23138, 23299, 23307, 23370, 23373, 23396, 23594, 23649, 24137, 24148, 25789, 25862, 26000, 26000, 26251, 26255, 26528, 27156, 27245, 27324, 27338, 28231, 28511, 29089, 29128, 29843, 29954, 51203, 51291, 51412, 51512, 51514, 51621, 51673, 51690, 53354, 53615, 53637, 53820, 53820, 54332, 54438, 54443, 54503, 54520, 54734, 54825, 55038, 55071, 55122, 55135, 55143, 55165, 55224, 55229, 55247, 55295, 55355, 55388, 55530, 55635, 55658, 55722, 55723, 55753, 55771, 55789, 55964, 56033, 56675, 56896, 56901, 56905, 56938, 56995, 57082, 57125, 57156, 57405, 57418, 57464, 57468, 57473, 57540, 57574, 57657, 57719, 58492, 58509, 60386, 63967, 64105, 64377, 64711, 64858, 65012, 65055, 79002, 79019, 79075, 79140, 79173, 79575, 79605, 79677, 79709, 79728, 79784, 79801, 79829, 79862, 79968, 80178, 80329, 80757, 81539, 81576, 81620, 81831, 81930, 83481, 83546, 83694, 83723, 83786, 83903, 84131, 84140, 84444, 84464, 84530, 84634, 84684, 84687, 84823, 84894, 85356, 85446, 85446, 85446, 85455, 89796, 89839, 89891, 90249, 90378, 90379, 90557, 90580, 90668, 90835, 91039, 92591, 92691, 93323, 94032, 108961, 113130, 114787, 115650, 115827, 115948, 116028, 124222, 126567, 128239, 134266, 138715, 146330, 146909, 147341, 147841, 149175, 150468, 151835, 153478, 158405, 164284, 165918, 169714, 170393, 170463, 171169, 192683, 195828, 196403, 199699, 201161, 201725, 219988, 220042, 220134, 220359, 221150, 222389, 222662, 245812, 253430, 253982, 254099, 254173, 254263, 254295, 254559, 255349, 256472, 259266, 283385, 283431, 283989, 284069, 284338, 284339, 284403, 284716, 284992, 285643, 286151, 286826, 338707, 339674, 339778, 343702, 348738, 349152, 374407, 374946, 386684, 387273, 389792, 391123, 399665, 401491, 401548, 401647, 401827, 404217, 440021, 494143, 494470, 574029, 645191, 653820, 654429, 728116, 100124700, 100130776, 100133941, 101927813, 101929705, 5426, 84642 |
| PN | Phillips et al., Cancer Cell (2006) | 108, 163, 230, 348, 403, 429, 534, 547, 650, 1038, 1272, 1410, 1645, 1826, 2037, 2047, 2147, 2257, 2258, 2259, 2550, 2556, 2562, 2571, 2746, 2747, 2774, 2775, 2890, 2891, 2893, 2894, 2900, 3131, 3400, 3745, 3782, 3798, 3821, 3823, 3983, 4093, 4094, 4137, 4168, 4330, 4675, 4684, 4915, 4926, 4974, 4978, 5017, 5027, 5046, 5067, 5138, 5164, 5166, 5590, 5662, 5730, 5881, 5911, 6125, 6137, 6167, 6252, 6319, 6328, 6445, 6456, 6505, 6509, 6571, 6585, 6751, 6752, 6886, 7067, 7079, 7168, 7477, 7915, 8502, 8549, 8787, 8812, 9026, 9185, 9229, 9241, 9568, 9699, 9844, 9846, 9892, 9951, 10014, 10083, 10129, 10203, 10215, 10276, 10580, 10633, 10683, 10690, 10718, 10882, 10900, 11074, 22885, 22986, 23017, 23046, 23220, 23236, 23373, 23492, 23493, 23542, 23544, 23769, 25789, 25817, 25956, 26032, 26033, 26050, 26052, 26232, 26999, 27087, 27254, 27344, 27439, 28514, 29106, 29767, 30812, 30845, 51560, 51704, 53342, 53616, 53826, 53829, 53844, 54988, 55022, 55217, 55273, 55553, 55612, 55966, 56288, 56475, 56479, 56521, 56884, 56899, 56961, 57338, 57348, 57406, 57447, 57453, 57512, 57628, 58473, 58504, 59277, 63827, 63876, 64093, 64101, 64376, 65258, 78986, 79176, 79187, 79754, 80309, 80351, 83698, 83937, 84440, 84457, 84502, 84631, 89874, 90362, 91752, 114788, 114805, 116154, 116173, 116448, 118738, 128414, 129049, 129807, 140767, 153811, 219654, 219736, 219931, 220164, 255426, 256987, 259217, 259232, 283455, 283576, 284244, 286499, 338645, 340554, 349136, 386618, 728215, 5414, 10777, 222389, 738, 196500, 28984, 55857, 134701, 4325, 375704, 286097, 220965, 2681, 143381, 202451, 254559, 650392, 8123, 387590, 54886 |
| MES | Phillips et al., Cancer Cell (2006) | 59, 87, 285, 290, 602, 715, 771, 861, 871, 976, 977, 1116, 1200, 1282, 1284, 1889, 1902, 1948, 2012, 2014, 2034, 2200, 2242, 2266, 2316, 2321, 2355, 2358, 2615, 2683, 3101, 3269, 3371, 3383, 3675, 3678, 3679, 3726, 3976, 4323, 4627, 4642, 5002, 5054, 5069, 5154, 5157, 5265, 5266, 5322, 5328, 5329, 5371, 5606, 5756, 5819, 6237, 6238, 6263, 6282, 6448, 6464, 6876, 7056, 7076, 7791, 8572, 8693, 8793, 8828, 8829, 9021, 9103, 9123, 9180, 9235, 9260, 9454, 9961, 10395, 10398, 10410, 10581, 10630, 11082, 11178, 22904, 25825, 26031, 26231, 27443, 29126, 30008, 30846, 50619, 51129, 51279, 51312, 53834, 53918, 55020, 55240, 56926, 56937, 56975, 56996, 57124, 57167, 57381, 57619, 63892, 64116, 79156, 80270, 80305, 81622, 81844, 83855, 83871, 84875, 90853, 91107, 114897, 126133, 140825, 196410, 199720, 221395, 284119, 284207, 388115, 399473, 647115, 8553, 55267, 9780, 100132244, 151300, 727901 |
| PRF | Phillips et al., Cancer Cell (2006) | 97, 580, 672, 699, 890, 891, 990, 995, 1017, 1029, 1031, 1058, 1062, 1063, 1111, 1164, 1719, 1869, 1894, 1964, 2013, 2146, 2177, 2491, 2730, 3070, 3148, 3161, 3598, 3673, 4001, 4085, 4116, 4171, 4175, 4291, 4678, 4751, 4867, 4925, 5074, 5111, 5163, 5303, 5393, 5480, 5558, 5634, 5888, 5932, 5965, 5984, 6119, 6240, 6241, 6474, 6491, 6790, 6941, 7112, 7153, 7272, 7298, 7398, 7465, 7518, 7913, 7979, 8089, 8208, 8833, 8836, 8914, 9134, 9140, 9360, 9493, 9735, 9768, 9787, 9833, 9837, 9928, 10036, 10040, 10051, 10052, 10403, 10592, 10605, 10635, 10733, 10926, 11130, 11169, 22823, 22995, 23089, 23366, 23397, 23421, 23461, 23658, 24137, 26271, 27101, 29957, 29969, 29980, 51203, 51514, 51605, 51659, 51668, 54821, 54970, 55055, 55110, 55151, 55215, 55329, 55355, 55521, 55732, 55839, 55871, 56938, 57001, 57415, 58487, 64105, 64149, 64151, 79022, 79733, 79980, 79989, 80173, 80204, 81853, 81930, 83540, 83879, 84057, 84250, 84283, 84288, 89891, 91057, 91687, 92092, 92610, 121227, 132430, 132884, 139886, 144455, 147841, 151246, 165055, 171586, 195828, 221662, 259266, 374618, 441054, 63926, 55010, 574036, 84791, 89876, 84984, 387103, 115106, 983, 54801, 643911, 79682, 23594, 122769, 8487 |
