# Supplementary material for: Integrated Classification of Prostate Cancer Reveals a Novel Luminal Subtype with Poor Outcome
Source: Oxford University Press journal article supplement (doi:10.1158/0008-5472.can-16-0902), 2016-06-15
Supplement: 00085472can160902-sup-164316_1_supp_3486155_k6xg3k.docx [file 00085472can160902-sup-164316_1_supp_3486155_k6xg3k.docx]

Supplementary Table S4. List of 428 SEGs.

| Figure 4A order | Entrez Gene ID | Symbol | Subtype ID | Fold change in PCS1 | Fold change in PCS2 | Fold change in PCS3 |
| --- | --- | --- | --- | --- | --- | --- |
| 1 | 699 | BUB1 | 1 | 0.733 | -0.29 | -0.359 |
| 2 | 24137 | KIF4A | 1 | 0.797 | -0.36 | -0.354 |
| 3 | 890 | CCNA2 | 1 | 0.705 | -0.23 | -0.389 |
| 4 | 1062 | CENPE | 1 | 0.607 | -0.25 | -0.29 |
| 5 | 1164 | CKS2 | 1 | 1.037 | -0.26 | -0.649 |
| 6 | 9787 | DLGAP5 | 1 | 0.832 | -0.31 | -0.423 |
| 7 | 11004 | KIF2C | 1 | 0.737 | -0.37 | -0.289 |
| 8 | 701 | BUB1B | 1 | 0.742 | -0.23 | -0.428 |
| 9 | 983 | CDK1 | 1 | 0.965 | -0.3 | -0.547 |
| 10 | 990 | CDC6 | 1 | 0.617 | -0.17 | -0.374 |
| 11 | 1058 | CENPA | 1 | 0.704 | -0.34 | -0.291 |
| 12 | 9493 | KIF23 | 1 | 0.61 | -0.32 | -0.227 |
| 13 | 891 | CCNB1 | 1 | 0.796 | -0.16 | -0.539 |
| 14 | 991 | CDC20 | 1 | 0.918 | -0.46 | -0.365 |
| 15 | 1063 | CENPF | 1 | 1.176 | -0.45 | -0.593 |
| 16 | 3161 | HMMR | 1 | 0.917 | -0.29 | -0.519 |
| 17 | 6241 | RRM2 | 1 | 0.963 | -0.26 | -0.582 |
| 18 | 6790 | AURKA | 1 | 0.789 | -0.26 | -0.435 |
| 19 | 9133 | CCNB2 | 1 | 0.869 | -0.2 | -0.561 |
| 20 | 9232 | PTTG1 | 1 | 1.163 | -0.55 | -0.492 |
| 21 | 9735 | KNTC1 | 1 | 0.611 | -0.26 | -0.287 |
| 22 | 9928 | KIF14 | 1 | 0.58 | -0.32 | -0.203 |
| 23 | 11130 | ZWINT | 1 | 0.904 | -0.19 | -0.602 |
| 24 | 51203 | NUSAP1 | 1 | 1.089 | -0.33 | -0.632 |
| 25 | 113130 | CDCA5 | 1 | 0.688 | -0.3 | -0.311 |
| 26 | 259266 | ASPM | 1 | 0.913 | -0.38 | -0.434 |
| 27 | 4173 | MCM4 | 1 | 0.662 | -0.25 | -0.341 |
| 28 | 9768 | KIAA0101 | 1 | 1.068 | -0.27 | -0.668 |
| 29 | 22974 | TPX2 | 1 | 1.099 | -0.39 | -0.579 |
| 30 | 29128 | UHRF1 | 1 | 0.748 | -0.35 | -0.316 |
| 31 | 51514 | DTL | 1 | 0.687 | -0.36 | -0.262 |
| 32 | 332 | BIRC5 | 1 | 0.927 | -0.4 | -0.423 |
| 33 | 1894 | ECT2 | 1 | 0.654 | 0.15 | -0.698 |
| 34 | 2171 | FABP5 | 1 | 0.59 | -0.08 | -0.428 |
| 35 | 4001 | LMNB1 | 1 | 0.691 | -0.26 | -0.357 |
| 36 | 7153 | TOP2A | 1 | 1.213 | -0.33 | -0.733 |
| 37 | 7272 | TTK | 1 | 0.785 | -0.2 | -0.493 |
| 38 | 7298 | TYMS | 1 | 0.717 | -0.34 | -0.303 |
| 39 | 8318 | CDC45 | 1 | 0.602 | -0.25 | -0.286 |
| 40 | 9088 | PKMYT1 | 1 | 0.608 | -0.37 | -0.182 |
| 41 | 9833 | MELK | 1 | 1.008 | -0.35 | -0.538 |
| 42 | 10112 | KIF20A | 1 | 0.878 | -0.38 | -0.406 |
| 43 | 11113 | CIT | 1 | 0.587 | -0.35 | -0.181 |
| 44 | 54845 | ESRP1 | 1 | 0.61 | 0.232 | -0.736 |
| 45 | 55355 | HJURP | 1 | 0.656 | -0.23 | -0.347 |
| 46 | 64151 | NCAPG | 1 | 0.872 | -0.35 | -0.429 |
| 47 | 79019 | CENPM | 1 | 0.59 | -0.31 | -0.221 |
| 48 | 81831 | NETO2 | 1 | 0.61 | 0.162 | -0.672 |
| 49 | 55502 | HES6 | 1 | 0.604 | -0.27 | -0.273 |
| 50 | 2146 | EZH2 | 1 | 1.007 | -0.2 | -0.676 |
| 51 | 7366 | UGT2B15 | 1 | 0.609 | -0.43 | -0.122 |
| 52 | 54443 | ANLN | 1 | 0.696 | -0.32 | -0.3 |
| 53 | 54892 | NCAPG2 | 1 | 0.611 | -0.12 | -0.416 |
| 54 | 56992 | KIF15 | 1 | 0.699 | -0.31 | -0.312 |
| 55 | 83540 | NUF2 | 1 | 0.753 | -0.31 | -0.358 |
| 56 | 213 | ALB | 1 | 0.631 | -0.32 | -0.249 |
| 57 | 367 | AR | 1 | 0.739 | -0.09 | -0.555 |
| 58 | 2305 | FOXM1 | 1 | 0.693 | -0.34 | -0.279 |
| 59 | 3148 | HMGB2 | 1 | 0.594 | -0.18 | -0.346 |
| 60 | 3832 | KIF11 | 1 | 0.603 | -0.21 | -0.326 |
| 61 | 3925 | STMN1 | 1 | 0.756 | -0.2 | -0.465 |
| 62 | 4288 | MKI67 | 1 | 0.634 | -0.18 | -0.382 |
| 63 | 7083 | TK1 | 1 | 0.835 | -0.49 | -0.267 |
| 64 | 9055 | PRC1 | 1 | 0.881 | -0.29 | -0.487 |
| 65 | 9134 | CCNE2 | 1 | 0.6 | -0.18 | -0.353 |
| 66 | 9156 | EXO1 | 1 | 0.604 | -0.31 | -0.235 |
| 67 | 10024 | TROAP | 1 | 0.723 | -0.39 | -0.26 |
| 68 | 10460 | TACC3 | 1 | 0.619 | -0.38 | -0.185 |
| 69 | 11065 | UBE2C | 1 | 1.164 | -0.47 | -0.566 |
| 70 | 29089 | UBE2T | 1 | 0.894 | -0.39 | -0.411 |
| 71 | 29127 | RACGAP1 | 1 | 0.749 | -0.24 | -0.42 |
| 72 | 55143 | CDCA8 | 1 | 0.619 | -0.26 | -0.287 |
| 73 | 55165 | CEP55 | 1 | 0.698 | -0.28 | -0.336 |
| 74 | 55872 | PBK | 1 | 0.895 | -0.34 | -0.458 |
| 75 | 79682 | MLF1IP | 1 | 0.8 | -0.17 | -0.531 |
| 76 | 374393 | FAM111B | 1 | 0.581 | -0.19 | -0.326 |
| 77 | 3223 | HOXC6 | 1 | 0.633 | 0.21 | -0.735 |
| 78 | 1033 | CDKN3 | 1 | 0.868 | -0.29 | -0.481 |
| 79 | 1951 | CELSR3 | 1 | 0.659 | -0.39 | -0.202 |
| 80 | 6472 | SHMT2 | 1 | 0.599 | -0.03 | -0.485 |
| 81 | 6696 | SPP1 | 1 | 0.841 | -0.37 | -0.383 |
| 82 | 8438 | RAD54L | 1 | 0.618 | -0.32 | -0.234 |
| 83 | 10615 | SPAG5 | 1 | 0.785 | -0.31 | -0.387 |
| 84 | 10721 | POLQ | 1 | 0.581 | -0.28 | -0.238 |
| 85 | 29923 | HILPDA | 1 | 0.796 | -0.31 | -0.4 |
| 86 | 51155 | HN1 | 1 | 0.631 | -0.13 | -0.419 |
| 87 | 8611 | PPAP2A | 2 | -0.23 | 0.73 | -0.472 |
| 88 | 10551 | AGR2 | 2 | -0.58 | 0.974 | -0.395 |
| 89 | 4824 | NKX3-1 | 2 | -0.31 | 0.585 | -0.276 |
| 90 | 4072 | EPCAM | 2 | 0.349 | 0.63 | -0.879 |
| 91 | 5865 | RAB3B | 2 | -0.18 | 0.895 | -0.672 |
| 92 | 6480 | ST6GAL1 | 2 | -0.56 | 0.691 | -0.159 |
| 93 | 23671 | TMEFF2 | 2 | 0.147 | 0.789 | -0.852 |
| 94 | 262 | AMD1 | 2 | -0.32 | 0.657 | -0.326 |
| 95 | 10040 | TOM1L1 | 2 | -0.03 | 0.611 | -0.537 |
| 96 | 384 | ARG2 | 2 | -0.45 | 0.625 | -0.192 |
| 97 | 776 | CACNA1D | 2 | 0.129 | 0.628 | -0.688 |
| 98 | 2982 | GUCY1A3 | 2 | -0.09 | 0.655 | -0.527 |
| 99 | 6675 | UAP1 | 2 | -0 | 0.682 | -0.624 |
| 100 | 354 | KLK3 | 2 | -0.56 | 0.738 | -0.196 |
| 101 | 2153 | F5 | 2 | 0.265 | 0.774 | -0.939 |
| 102 | 3109 | HLA-DMB | 2 | -0.43 | 0.833 | -0.399 |
| 103 | 3781 | KCNN2 | 2 | -0.02 | 0.834 | -0.751 |
| 104 | 10257 | ABCC4 | 2 | -0.04 | 0.841 | -0.741 |
| 105 | 27347 | STK39 | 2 | -0.13 | 0.623 | -0.458 |
| 106 | 57630 | SH3RF1 | 2 | 0.047 | 0.602 | -0.594 |
| 107 | 445347 | TARP | 2 | -0.14 | 0.94 | -0.743 |
| 108 | 1298 | COL9A2 | 2 | -0.19 | 0.674 | -0.453 |
| 109 | 1803 | DPP4 | 2 | -0.86 | 0.714 | 0.082 |
| 110 | 2690 | GHR | 2 | -0.43 | 0.657 | -0.24 |
| 111 | 4646 | MYO6 | 2 | 0.077 | 0.905 | -0.898 |
| 112 | 81035 | COLEC12 | 2 | -0.09 | 0.589 | -0.468 |
| 113 | 55 | ACPP | 2 | -1.24 | 0.798 | 0.326 |
| 114 | 220 | ALDH1A3 | 2 | -0.75 | 0.875 | -0.16 |
| 115 | 288 | ANK3 | 2 | -0.18 | 0.585 | -0.386 |
| 116 | 1718 | DHCR24 | 2 | -0.1 | 0.661 | -0.519 |
| 117 | 1824 | DSC2 | 2 | -0.17 | 0.732 | -0.528 |
| 118 | 2078 | ERG | 2 | -0.48 | 1.143 | -0.643 |
| 119 | 2152 | F3 | 2 | -0.77 | 0.7 | 0.014 |
| 120 | 2181 | ACSL3 | 2 | -0.16 | 0.777 | -0.579 |
| 121 | 2331 | FMOD | 2 | -0.97 | 0.848 | 0.049 |
| 122 | 2650 | GCNT1 | 2 | -0.1 | 0.819 | -0.671 |
| 123 | 2705 | GJB1 | 2 | -0.16 | 0.678 | -0.484 |
| 124 | 3249 | HPN | 2 | 0.233 | 0.714 | -0.856 |
| 125 | 3817 | KLK2 | 2 | -0.52 | 0.619 | -0.124 |
| 126 | 3936 | LCP1 | 2 | -0.58 | 0.625 | -0.081 |
| 127 | 4070 | TACSTD2 | 2 | -0.68 | 0.711 | -0.069 |
| 128 | 4477 | MSMB | 2 | -1.67 | 0.865 | 0.635 |
| 129 | 4604 | MYBPC1 | 2 | -0.68 | 0.713 | -0.071 |
| 130 | 5238 | PGM3 | 2 | -0.12 | 0.676 | -0.522 |
| 131 | 5530 | PPP3CA | 2 | -0.01 | 0.613 | -0.555 |
| 132 | 6652 | SORD | 2 | -0.42 | 0.644 | -0.236 |
| 133 | 6695 | SPOCK1 | 2 | -0.43 | 0.959 | -0.512 |
| 134 | 7113 | TMPRSS2 | 2 | -0.35 | 0.626 | -0.278 |
| 135 | 7941 | PLA2G7 | 2 | -0.27 | 1.198 | -0.872 |
| 136 | 8671 | SLC4A4 | 2 | -0.37 | 0.704 | -0.328 |
| 137 | 9073 | CLDN8 | 2 | -0.17 | 0.826 | -0.617 |
| 138 | 10269 | ZMPSTE24 | 2 | -0.05 | 0.611 | -0.521 |
| 139 | 10321 | CRISP3 | 2 | -0.16 | 1.018 | -0.802 |
| 140 | 10611 | PDLIM5 | 2 | 0.137 | 0.592 | -0.661 |
| 141 | 10788 | IQGAP2 | 2 | -0.32 | 0.907 | -0.565 |
| 142 | 10954 | PDIA5 | 2 | -0.09 | 0.582 | -0.46 |
| 143 | 23316 | CUX2 | 2 | -0.43 | 0.605 | -0.185 |
| 144 | 23327 | NEDD4L | 2 | -0.06 | 0.646 | -0.541 |
| 145 | 25800 | SLC39A6 | 2 | -0.06 | 0.629 | -0.524 |
| 146 | 51109 | RDH11 | 2 | -0.38 | 0.588 | -0.212 |
| 147 | 51313 | FAM198B | 2 | -0.17 | 0.591 | -0.399 |
| 148 | 51365 | PLA1A | 2 | -0.13 | 0.826 | -0.652 |
| 149 | 57600 | FNIP2 | 2 | -0.12 | 0.742 | -0.578 |
| 150 | 58511 | DNASE2B | 2 | -0.07 | 0.682 | -0.568 |
| 151 | 59084 | ENPP5 | 2 | -0.27 | 0.585 | -0.304 |
| 152 | 60481 | ELOVL5 | 2 | -0.12 | 0.621 | -0.47 |
| 153 | 79054 | TRPM8 | 2 | -0.52 | 0.886 | -0.372 |
| 154 | 79689 | STEAP4 | 2 | -0.26 | 0.78 | -0.493 |
| 155 | 116285 | ACSM1 | 2 | 0.164 | 0.723 | -0.806 |
| 156 | 130733 | TMEM178A | 2 | -0.69 | 0.848 | -0.19 |
| 157 | 143503 | OR51E1 | 2 | -0.12 | 0.641 | -0.483 |
| 158 | 148327 | CREB3L4 | 2 | -0.19 | 0.621 | -0.412 |
| 159 | 151258 | SLC38A11 | 2 | -0.19 | 0.589 | -0.378 |
| 160 | 9185 | REPS2 | 2 | -0.05 | 0.647 | -0.549 |
| 161 | 2203 | FBP1 | 2 | -0.37 | 0.713 | -0.34 |
| 162 | 7782 | SLC30A4 | 2 | -0.49 | 0.678 | -0.201 |
| 163 | 10481 | HOXB13 | 2 | -0.04 | 0.611 | -0.531 |
| 164 | 11001 | SLC27A2 | 2 | 0.078 | 0.581 | -0.602 |
| 165 | 57535 | KIAA1324 | 2 | -0.6 | 0.837 | -0.258 |
| 166 | 120224 | TMEM45B | 2 | 0.173 | 0.677 | -0.772 |
| 167 | 306 | ANXA3 | 2 | -0.91 | 0.918 | -0.061 |
| 168 | 957 | ENTPD5 | 2 | -0.15 | 0.696 | -0.509 |
| 169 | 2346 | FOLH1 | 2 | 0.03 | 0.926 | -0.877 |
| 170 | 3081 | HGD | 2 | -0.57 | 0.717 | -0.175 |
| 171 | 4744 | NEFH | 2 | -1.38 | 0.58 | 0.646 |
| 172 | 4852 | NPY | 2 | -1.12 | 1.599 | -0.513 |
| 173 | 5320 | PLA2G2A | 2 | -0.88 | 0.833 | -0.012 |
| 174 | 5874 | RAB27B | 2 | -0.4 | 0.595 | -0.206 |
| 175 | 6296 | ACSM3 | 2 | 2E-04 | 0.653 | -0.601 |
| 176 | 6558 | SLC12A2 | 2 | -0.41 | 0.74 | -0.326 |
| 177 | 6646 | SOAT1 | 2 | -0.13 | 0.602 | -0.445 |
| 178 | 7103 | TSPAN8 | 2 | -0.43 | 0.63 | -0.214 |
| 179 | 9375 | TM9SF2 | 2 | -0.25 | 0.587 | -0.328 |
| 180 | 9413 | FAM189A2 | 2 | -0.52 | 0.58 | -0.089 |
| 181 | 10103 | TSPAN1 | 2 | -0.42 | 0.716 | -0.302 |
| 182 | 11013 | TMSB15A | 2 | -0.04 | 0.851 | -0.753 |
| 183 | 23600 | AMACR | 2 | 0.188 | 1.177 | -1.244 |
| 184 | 25874 | MPC2 | 2 | 0.115 | 0.594 | -0.645 |
| 185 | 26503 | SLC17A5 | 2 | -0.08 | 0.591 | -0.475 |
| 186 | 26872 | STEAP1 | 2 | 0.065 | 0.6 | -0.608 |
| 187 | 26996 | GPR160 | 2 | 0.169 | 0.821 | -0.9 |
| 188 | 27249 | MMADHC | 2 | -0.31 | 0.662 | -0.343 |
| 189 | 51084 | CRYL1 | 2 | -0.32 | 0.619 | -0.298 |
| 190 | 51170 | HSD17B11 | 2 | -0.06 | 0.601 | -0.506 |
| 191 | 51280 | GOLM1 | 2 | -0.31 | 0.914 | -0.574 |
| 192 | 51302 | CYP39A1 | 2 | -0.29 | 0.624 | -0.323 |
| 193 | 51635 | DHRS7 | 2 | -0.37 | 0.742 | -0.364 |
| 194 | 51809 | GALNT7 | 2 | -0.11 | 0.78 | -0.623 |
| 195 | 54431 | DNAJC10 | 2 | -0.14 | 0.767 | -0.59 |
| 196 | 54502 | RBM47 | 2 | -0.21 | 0.585 | -0.359 |
| 197 | 55790 | CSGALNACT1 | 2 | -0.58 | 0.877 | -0.313 |
| 198 | 56165 | TDRD1 | 2 | -0.4 | 1.094 | -0.661 |
| 199 | 64094 | SMOC2 | 2 | -0.5 | 0.621 | -0.147 |
| 200 | 80110 | ZNF614 | 2 | -0.05 | 0.607 | -0.517 |
| 201 | 80157 | CWH43 | 2 | -0.35 | 0.614 | -0.261 |
| 202 | 81285 | OR51E2 | 2 | -0.51 | 1.197 | -0.661 |
| 203 | 84419 | C15orf48 | 2 | -0.46 | 0.607 | -0.166 |
| 204 | 84899 | TMTC4 | 2 | -0.08 | 0.66 | -0.54 |
| 205 | 90701 | SEC11C | 2 | -0.29 | 0.742 | -0.437 |
| 206 | 92292 | GLYATL1 | 2 | -0.06 | 0.704 | -0.595 |
| 207 | 131034 | CPNE4 | 2 | -0.29 | 0.788 | -0.477 |
| 208 | 219595 | FOLH1B | 2 | 0.156 | 0.635 | -0.718 |
| 209 | 284370 | ZNF615 | 2 | -0.09 | 0.586 | -0.464 |
| 210 | 70 | ACTC1 | 3 | -1.02 | -0.15 | 1.011 |
| 211 | 72 | ACTG2 | 3 | -1.77 | 0.32 | 1.218 |
| 212 | 477 | ATP1A2 | 3 | -0.87 | -0.17 | 0.899 |
| 213 | 5919 | RARRES2 | 3 | -0.66 | -0.29 | 0.839 |
| 214 | 2919 | CXCL1 | 3 | -0.46 | -0.24 | 0.612 |
| 215 | 5239 | PGM5 | 3 | -1.25 | -0.01 | 1.08 |
| 216 | 6876 | TAGLN | 3 | -0.95 | -0.05 | 0.856 |
| 217 | 7881 | KCNAB1 | 3 | -0.51 | -0.17 | 0.591 |
| 218 | 10418 | SPON1 | 3 | -0.55 | -0.21 | 0.662 |
| 219 | 284 | ANGPT1 | 3 | -0.69 | -0.17 | 0.75 |
| 220 | 1674 | DES | 3 | -1.32 | -0.07 | 1.193 |
| 221 | 1805 | DPT | 3 | -0.62 | -0.27 | 0.779 |
| 222 | 2354 | FOSB | 3 | -1.03 | 0.277 | 0.629 |
| 223 | 2568 | GABRP | 3 | -0.39 | -0.28 | 0.595 |
| 224 | 4638 | MYLK | 3 | -1.44 | 0.28 | 0.973 |
| 225 | 4660 | PPP1R12B | 3 | -0.76 | 0.013 | 0.637 |
| 226 | 4681 | NBL1 | 3 | -0.58 | -0.19 | 0.667 |
| 227 | 4921 | DDR2 | 3 | -0.62 | -0.06 | 0.581 |
| 228 | 5918 | RARRES1 | 3 | -0.67 | -0.18 | 0.738 |
| 229 | 5947 | RBP1 | 3 | -0.28 | -0.37 | 0.581 |
| 230 | 7047 | TGM4 | 3 | -0.71 | -0.12 | 0.719 |
| 231 | 7169 | TPM2 | 3 | -1.14 | -0.15 | 1.114 |
| 232 | 9510 | ADAMTS1 | 3 | -0.57 | -0.17 | 0.651 |
| 233 | 10563 | CXCL13 | 3 | -0.22 | -0.52 | 0.66 |
| 234 | 3371 | TNC | 3 | -0.58 | -0.12 | 0.606 |
| 235 | 4684 | NCAM1 | 3 | -0.27 | -0.42 | 0.619 |
| 236 | 59 | ACTA2 | 3 | -1.07 | 0.044 | 0.877 |
| 237 | 290 | ANPEP | 3 | -0.86 | 0.065 | 0.678 |
| 238 | 467 | ATF3 | 3 | -0.81 | 0.106 | 0.6 |
| 239 | 1288 | COL4A6 | 3 | -0.68 | -0.23 | 0.791 |
| 240 | 1410 | CRYAB | 3 | -0.72 | -0.39 | 0.983 |
| 241 | 2294 | FOXF1 | 3 | -0.64 | -0.19 | 0.722 |
| 242 | 2316 | FLNA | 3 | -0.8 | -0.06 | 0.739 |
| 243 | 2920 | CXCL2 | 3 | -0.46 | -0.24 | 0.611 |
| 244 | 3678 | ITGA5 | 3 | -0.51 | -0.28 | 0.695 |
| 245 | 3679 | ITGA7 | 3 | -0.58 | -0.18 | 0.655 |
| 246 | 3872 | KRT17 | 3 | -0.59 | -0.22 | 0.71 |
| 247 | 4118 | MAL | 3 | -0.3 | -0.4 | 0.63 |
| 248 | 4629 | MYH11 | 3 | -1.55 | 0.135 | 1.203 |
| 249 | 5179 | PENK | 3 | -0.42 | -0.41 | 0.73 |
| 250 | 5268 | SERPINB5 | 3 | -0.5 | -0.19 | 0.597 |
| 251 | 5376 | PMP22 | 3 | -0.58 | -0.23 | 0.712 |
| 252 | 5730 | PTGDS | 3 | -1.01 | -0.03 | 0.89 |
| 253 | 6277 | S100A6 | 3 | -0.63 | -0.22 | 0.746 |
| 254 | 6387 | CXCL12 | 3 | -0.46 | -0.21 | 0.587 |
| 255 | 6525 | SMTN | 3 | -0.73 | -0.21 | 0.818 |
| 256 | 6716 | SRD5A2 | 3 | -1.02 | 0.009 | 0.864 |
| 257 | 7168 | TPM1 | 3 | -0.88 | 0.135 | 0.631 |
| 258 | 7538 | ZFP36 | 3 | -1.11 | 0.393 | 0.592 |
| 259 | 8013 | NR4A3 | 3 | -0.65 | -0.03 | 0.586 |
| 260 | 8406 | SRPX | 3 | -0.57 | -0.14 | 0.621 |
| 261 | 8854 | ALDH1A2 | 3 | -0.78 | -0.03 | 0.696 |
| 262 | 8870 | IER3 | 3 | -0.53 | -0.24 | 0.668 |
| 263 | 9021 | SOCS3 | 3 | -0.77 | -0.02 | 0.672 |
| 264 | 9260 | PDLIM7 | 3 | -0.49 | -0.25 | 0.645 |
| 265 | 9506 | PAGE4 | 3 | -1.39 | 0.087 | 1.109 |
| 266 | 10398 | MYL9 | 3 | -1.13 | -0.16 | 1.117 |
| 267 | 10580 | SORBS1 | 3 | -0.98 | 0.011 | 0.831 |
| 268 | 22943 | DKK1 | 3 | -0.37 | -0.3 | 0.592 |
| 269 | 25802 | LMOD1 | 3 | -1.04 | -0.13 | 1.011 |
| 270 | 30008 | EFEMP2 | 3 | -0.36 | -0.32 | 0.609 |
| 271 | 50859 | SPOCK3 | 3 | -0.86 | -0.06 | 0.789 |
| 272 | 53826 | FXYD6 | 3 | -0.55 | -0.32 | 0.764 |
| 273 | 64093 | SMOC1 | 3 | -0.45 | -0.22 | 0.589 |
| 274 | 284119 | PTRF | 3 | -0.8 | -0.08 | 0.754 |
| 275 | 316 | AOX1 | 3 | -0.74 | -0.12 | 0.747 |
| 276 | 390 | RND3 | 3 | -0.8 | -0.05 | 0.735 |
| 277 | 443 | ASPA | 3 | -0.45 | -0.26 | 0.618 |
| 278 | 493 | ATP2B4 | 3 | -0.56 | -0.14 | 0.607 |
| 279 | 629 | CFB | 3 | -0.64 | -0.05 | 0.593 |
| 280 | 653 | BMP5 | 3 | -0.29 | -0.36 | 0.583 |
| 281 | 710 | SERPING1 | 3 | -0.68 | -0.18 | 0.75 |
| 282 | 716 | C1S | 3 | -0.81 | -0.03 | 0.723 |
| 283 | 857 | CAV1 | 3 | -0.93 | -0.08 | 0.872 |
| 284 | 858 | CAV2 | 3 | -0.52 | -0.16 | 0.595 |
| 285 | 894 | CCND2 | 3 | -0.51 | -0.16 | 0.583 |
| 286 | 1066 | CES1 | 3 | -0.71 | -0.19 | 0.788 |
| 287 | 1191 | CLU | 3 | -0.7 | -0.31 | 0.891 |
| 288 | 1264 | CNN1 | 3 | -1.54 | 0.019 | 1.302 |
| 289 | 1291 | COL6A1 | 3 | -0.4 | -0.41 | 0.719 |
| 290 | 1292 | COL6A2 | 3 | -0.53 | -0.24 | 0.677 |
| 291 | 1307 | COL16A1 | 3 | -0.51 | -0.29 | 0.708 |
| 292 | 1346 | COX7A1 | 3 | -0.8 | -0.23 | 0.904 |
| 293 | 1465 | CSRP1 | 3 | -1.1 | 0.122 | 0.832 |
| 294 | 1577 | CYP3A5 | 3 | -0.58 | -0.23 | 0.711 |
| 295 | 1580 | CYP4B1 | 3 | -0.4 | -0.27 | 0.591 |
| 296 | 1593 | CYP27A1 | 3 | -0.57 | -0.21 | 0.682 |
| 297 | 1672 | DEFB1 | 3 | -0.4 | -0.29 | 0.612 |
| 298 | 1675 | CFD | 3 | -0.58 | -0.31 | 0.777 |
| 299 | 1809 | DPYSL3 | 3 | -0.7 | -0.07 | 0.665 |
| 300 | 2192 | FBLN1 | 3 | -1.13 | 0.033 | 0.934 |
| 301 | 2202 | EFEMP1 | 3 | -0.54 | -0.2 | 0.647 |
| 302 | 2263 | FGFR2 | 3 | -0.67 | -0.09 | 0.655 |
| 303 | 2273 | FHL1 | 3 | -1.11 | -0.01 | 0.962 |
| 304 | 2274 | FHL2 | 3 | -0.84 | -0.03 | 0.745 |
| 305 | 2318 | FLNC | 3 | -0.75 | -0.29 | 0.911 |
| 306 | 2564 | GABRE | 3 | -0.72 | -0.18 | 0.776 |
| 307 | 2619 | GAS1 | 3 | -0.72 | -0.11 | 0.716 |
| 308 | 2934 | GSN | 3 | -0.82 | -0.02 | 0.725 |
| 309 | 2944 | GSTM1 | 3 | -0.57 | -0.23 | 0.696 |
| 310 | 2946 | GSTM2 | 3 | -0.7 | -0.25 | 0.828 |
| 311 | 2949 | GSTM5 | 3 | -0.61 | -0.2 | 0.708 |
| 312 | 2950 | GSTP1 | 3 | -0.81 | -0.31 | 0.979 |
| 313 | 3397 | ID1 | 3 | -0.75 | -0.15 | 0.779 |
| 314 | 3399 | ID3 | 3 | -0.55 | -0.16 | 0.622 |
| 315 | 3489 | IGFBP6 | 3 | -0.75 | -0.27 | 0.891 |
| 316 | 3491 | CYR61 | 3 | -1.01 | 0.247 | 0.635 |
| 317 | 3569 | IL6 | 3 | -0.39 | -0.33 | 0.64 |
| 318 | 3764 | KCNJ8 | 3 | -0.37 | -0.3 | 0.585 |
| 319 | 3779 | KCNMB1 | 3 | -0.95 | -0.25 | 1.044 |
| 320 | 3852 | KRT5 | 3 | -0.95 | -0.18 | 0.987 |
| 321 | 3860 | KRT13 | 3 | -0.61 | -0.19 | 0.701 |
| 322 | 3866 | KRT15 | 3 | -1.1 | -0.08 | 1.022 |
| 323 | 3910 | LAMA4 | 3 | -0.37 | -0.33 | 0.623 |
| 324 | 3914 | LAMB3 | 3 | -0.59 | -0.23 | 0.719 |
| 325 | 3934 | LCN2 | 3 | -0.71 | -0.19 | 0.781 |
| 326 | 3956 | LGALS1 | 3 | -0.64 | -0.23 | 0.762 |
| 327 | 4057 | LTF | 3 | -1.1 | 0.124 | 0.828 |
| 328 | 4129 | MAOB | 3 | -0.94 | 0.026 | 0.783 |
| 329 | 4147 | MATN2 | 3 | -0.74 | 0.051 | 0.583 |
| 330 | 4211 | MEIS1 | 3 | -0.71 | -0.05 | 0.651 |
| 331 | 4212 | MEIS2 | 3 | -0.83 | -0.03 | 0.732 |
| 332 | 4239 | MFAP4 | 3 | -0.7 | -0.19 | 0.775 |
| 333 | 4920 | ROR2 | 3 | -0.49 | -0.18 | 0.589 |
| 334 | 4969 | OGN | 3 | -0.86 | 0.074 | 0.667 |
| 335 | 5099 | PCDH7 | 3 | -0.52 | -0.17 | 0.601 |
| 336 | 5121 | PCP4 | 3 | -1.57 | 0.231 | 1.133 |
| 337 | 5176 | SERPINF1 | 3 | -0.64 | -0.26 | 0.785 |
| 338 | 5348 | FXYD1 | 3 | -0.53 | -0.32 | 0.75 |
| 339 | 5350 | PLN | 3 | -0.85 | 0.008 | 0.721 |
| 340 | 5579 | PRKCB | 3 | -0.39 | -0.3 | 0.606 |
| 341 | 5648 | MASP1 | 3 | -0.44 | -0.22 | 0.586 |
| 342 | 5764 | PTN | 3 | -0.98 | 0.065 | 0.779 |
| 343 | 5837 | PYGM | 3 | -0.52 | -0.16 | 0.591 |
| 344 | 6273 | S100A2 | 3 | -0.54 | -0.14 | 0.599 |
| 345 | 6275 | S100A4 | 3 | -0.42 | -0.39 | 0.726 |
| 346 | 6347 | CCL2 | 3 | -0.78 | 0.006 | 0.663 |
| 347 | 6376 | CX3CL1 | 3 | -0.68 | -0.21 | 0.78 |
| 348 | 6401 | SELE | 3 | -0.8 | 0.056 | 0.635 |
| 349 | 6442 | SGCA | 3 | -0.41 | -0.26 | 0.59 |
| 350 | 6518 | SLC2A5 | 3 | -0.51 | -0.22 | 0.638 |
| 351 | 6563 | SLC14A1 | 3 | -0.79 | -0.06 | 0.739 |
| 352 | 6604 | SMARCD3 | 3 | -0.36 | -0.32 | 0.607 |
| 353 | 6769 | STAC | 3 | -0.47 | -0.21 | 0.596 |
| 354 | 6840 | SVIL | 3 | -0.67 | -0.03 | 0.595 |
| 355 | 7041 | TGFB1I1 | 3 | -0.52 | -0.25 | 0.667 |
| 356 | 7043 | TGFB3 | 3 | -0.57 | -0.29 | 0.759 |
| 357 | 7077 | TIMP2 | 3 | -0.44 | -0.26 | 0.614 |
| 358 | 7123 | CLEC3B | 3 | -0.34 | -0.36 | 0.618 |
| 359 | 7145 | TNS1 | 3 | -0.85 | -0.09 | 0.809 |
| 360 | 7205 | TRIP6 | 3 | -0.47 | -0.24 | 0.62 |
| 361 | 7356 | SCGB1A1 | 3 | -0.46 | -0.33 | 0.693 |
| 362 | 7414 | VCL | 3 | -0.6 | -0.11 | 0.619 |
| 363 | 7732 | RNF112 | 3 | -0.37 | -0.28 | 0.582 |
| 364 | 8309 | ACOX2 | 3 | -0.51 | -0.21 | 0.631 |
| 365 | 8404 | SPARCL1 | 3 | -1.2 | 0.169 | 0.874 |
| 366 | 8425 | LTBP4 | 3 | -0.53 | -0.15 | 0.596 |
| 367 | 8613 | PPAP2B | 3 | -0.67 | -0.04 | 0.612 |
| 368 | 8626 | TP63 | 3 | -1.07 | 0.025 | 0.896 |
| 369 | 8639 | AOC3 | 3 | -0.72 | -0.14 | 0.74 |
| 370 | 8654 | PDE5A | 3 | -0.88 | 0.092 | 0.67 |
| 371 | 9843 | HEPH | 3 | -0.45 | -0.27 | 0.638 |
| 372 | 10231 | RCAN2 | 3 | -0.64 | -0.22 | 0.749 |
| 373 | 10278 | EFS | 3 | -0.5 | -0.23 | 0.636 |
| 374 | 10290 | SPEG | 3 | -0.54 | -0.24 | 0.685 |
| 375 | 10335 | MRVI1 | 3 | -0.66 | -0.16 | 0.709 |
| 376 | 10406 | WFDC2 | 3 | -0.64 | -0.23 | 0.76 |
| 377 | 10562 | OLFM4 | 3 | -1.1 | 0.132 | 0.823 |
| 378 | 10826 | FAXDC2 | 3 | -0.48 | -0.23 | 0.623 |
| 379 | 10974 | ADIRF | 3 | -1.01 | 0.115 | 0.758 |
| 380 | 11030 | RBPMS | 3 | -0.63 | -0.17 | 0.701 |
| 381 | 11117 | EMILIN1 | 3 | -0.41 | -0.27 | 0.601 |
| 382 | 11155 | LDB3 | 3 | -0.53 | -0.22 | 0.656 |
| 383 | 11170 | FAM107A | 3 | -0.87 | -0.13 | 0.867 |
| 384 | 11259 | FILIP1L | 3 | -0.6 | -0.18 | 0.685 |
| 385 | 11341 | SCRG1 | 3 | -0.48 | -0.35 | 0.731 |
| 386 | 23022 | PALLD | 3 | -0.75 | -0.03 | 0.674 |
| 387 | 23336 | SYNM | 3 | -1.45 | 0.191 | 1.067 |
| 388 | 23584 | VSIG2 | 3 | -0.6 | -0.14 | 0.642 |
| 389 | 23650 | TRIM29 | 3 | -0.82 | -0.18 | 0.871 |
| 390 | 25959 | KANK2 | 3 | -0.56 | -0.14 | 0.61 |
| 391 | 25984 | KRT23 | 3 | -0.76 | -0.14 | 0.778 |
| 392 | 25999 | CLIP3 | 3 | -0.39 | -0.41 | 0.71 |
| 393 | 26353 | HSPB8 | 3 | -0.91 | -0.17 | 0.933 |
| 394 | 26577 | PCOLCE2 | 3 | -0.73 | -0.11 | 0.728 |
| 395 | 27122 | DKK3 | 3 | -0.7 | -0.09 | 0.684 |
| 396 | 27129 | HSPB7 | 3 | -0.36 | -0.32 | 0.598 |
| 397 | 29951 | PDZRN4 | 3 | -0.83 | -0.01 | 0.714 |
| 398 | 51285 | RASL12 | 3 | -0.57 | -0.31 | 0.769 |
| 399 | 51676 | ASB2 | 3 | -0.56 | -0.16 | 0.632 |
| 400 | 55679 | LIMS2 | 3 | -0.54 | -0.26 | 0.703 |
| 401 | 58189 | WFDC1 | 3 | -0.86 | -0.28 | 0.996 |
| 402 | 59353 | TMEM35 | 3 | -0.73 | -0.05 | 0.676 |
| 403 | 64091 | POPDC2 | 3 | -0.59 | -0.13 | 0.627 |
| 404 | 79625 | NDNF | 3 | -0.49 | -0.23 | 0.634 |
| 405 | 79630 | C1orf54 | 3 | -0.42 | -0.26 | 0.597 |
| 406 | 80206 | FHOD3 | 3 | -0.5 | -0.22 | 0.635 |
| 407 | 83643 | CCDC3 | 3 | -0.34 | -0.31 | 0.583 |
| 408 | 83716 | CRISPLD2 | 3 | -0.7 | -0.02 | 0.621 |
| 409 | 84417 | C2orf40 | 3 | -0.7 | -0.25 | 0.823 |
| 410 | 84617 | TUBB6 | 3 | -0.57 | -0.19 | 0.667 |
| 411 | 89927 | C16orf45 | 3 | -0.46 | -0.23 | 0.604 |
| 412 | 91624 | NEXN | 3 | -0.89 | -0.06 | 0.815 |
| 413 | 91851 | CHRDL1 | 3 | -0.99 | -0.05 | 0.896 |
| 414 | 93649 | MYOCD | 3 | -0.61 | -0.13 | 0.64 |
| 415 | 94274 | PPP1R14A | 3 | -0.46 | -0.32 | 0.688 |
| 416 | 112464 | PRKCDBP | 3 | -0.49 | -0.26 | 0.655 |
| 417 | 113146 | AHNAK2 | 3 | -0.49 | -0.31 | 0.709 |
| 418 | 116535 | MRGPRF | 3 | -0.64 | -0.13 | 0.67 |
| 419 | 118425 | PCAT4 | 3 | -0.84 | 0.126 | 0.604 |
| 420 | 126393 | HSPB6 | 3 | -0.51 | -0.29 | 0.704 |
| 421 | 140597 | TCEAL2 | 3 | -0.82 | -0.13 | 0.83 |
| 422 | 146713 | RBFOX3 | 3 | -0.6 | -0.1 | 0.611 |
| 423 | 147906 | DACT3 | 3 | -0.52 | -0.16 | 0.591 |
| 424 | 148741 | ANKRD35 | 3 | -0.57 | -0.2 | 0.676 |
| 425 | 171024 | SYNPO2 | 3 | -1.27 | 0.266 | 0.842 |
| 426 | 253827 | MSRB3 | 3 | -0.64 | -0.08 | 0.625 |
| 427 | 387763 | C11orf96 | 3 | -0.48 | -0.27 | 0.661 |
| 428 | 728264 | MIR143HG | 3 | -0.67 | -0.1 | 0.673 |
